# Supplementary material
Source: PubMed Central journal article supplement (PMC4273332)
Supplement: pnas.201420096SI.pdf [file pnas.201420096SI.pdf]

# Supporting Information

Manning and Peterson 10.1073/pnas.1420096111

## SI Materials and Methods

**Protein Purification.** Tandem affinity purification of SWI/SNF, RSC, SWI/SNF- $\Delta$ 10R, and Sir2p/Sir4p was performed as described (1, 2). FLAG purification of Isw2 and Sir3p was performed as described for Sir3p-FLAG (2), except that 350 mM NaCl (no KCl) was used during the entire purification and that following elution with 3 $\times$  FLAG peptide, the protein was concentrated to  $\sim$ 3 $\mu$ M with a 10,000 polyethersulfone (PES) molecular weight cutoff Vivaspin 500 concentrator (Sartorius; no. VS0101). Concentrated Sir3p was dialyzed (Pierce; no. 69570) for 2 h at 4 °C into storage buffer [20 mM Hepes, pH 7.5, 80 mM NaCl, 10% (vol/vol) glycerol, 0.1% Tween 20] and frozen in liquid nitrogen.

Concentrations of Sir3p and Sir2p/4p were calculated by ImageJ quantification ([imagej.nih.gov/ij/](http://imagej.nih.gov/ij/)) of Coomassie-stained SDS/PAGE gel image intensities, using purified fraction V BSA for known protein mass standards. Concentration of active chromatin-remodeling enzyme was calculated by measuring rates of ATP hydrolysis (see below) at saturating concentrations of dsDNA nucleic acid cofactor. These ATPase concentrations and Sir2p/Sir4p concentrations were used to load equimolar amounts of protein for SDS/PAGE analysis. Silver stain, immunodetection of Arp9p (for RSC and SWI/SNF), and immunodetection of the TAP tag resulted in intensities that were equivalent between complexes.

GST fusion proteins were expressed by using the pGEX-3X vector in Rosetta 2 BL-21 (DE3) cells (EMD; no. 71397). *Escherichia coli* were grown at 28 °C to an OD<sub>600</sub> of 0.5, in 50 mL of LB with 50  $\mu$ g/mL carbenicillin and 17  $\mu$ g/mL chloramphenicol, and then protein expression was induced by the addition of isopropyl beta-D-thiogalactoside (IPTG) to a final concentration of 0.2 mM. After 1 h of protein expression, *E. coli* were harvested by centrifugation at 2,500  $\times$  g at 4 °C for 15 min in a Beckman J-6B centrifuge with a JS-4.2 rotor. Cell pellet was stored at -80 °C and then thawed on ice and resuspended in 7.5 mL of lysis buffer [1 $\times$  PBS (pH 7.4) with 1% Triton, 1 mM DTT, and protease inhibitors (0.17  $\mu$ g/mL aprotinin, 2  $\mu$ g/mL leupeptin, 2  $\mu$ g/mL pepstatin, 100  $\mu$ g/mL PMSF, and 1 mM benzamide)]. After transfer to a 40-mL centrifuge tube, cells were lysed via four 15-s pulses of sonication (setting 5; Fisher 550 sonic dismembrator) interspersed with incubations on ice to prevent heat accumulation. Lysed cells were incubated on ice for 15 min and then bacterial debris was removed by centrifugation for 25 min at 27,000  $\times$  g, at 4 °C in a Beckman J2-HC centrifuge with a JA-17 rotor. Clear supernatant lysate was frozen in liquid nitrogen and stored at -80 °C.

Before each experiment, lysate aliquots were thawed on ice, and volumes of lysate containing equivalent amounts of each fusion protein (judged from lysate SDS/PAGE) were each brought to a final volume of 1.2 mL by the addition of lysis buffer in a 1.5-mL Eppendorf microcentrifuge tube. These lysates were incubated with 15  $\mu$ L of glutathione Sepharose 4B resin slurry (GE; no. 17-0756-01) at 4 °C on a nutator for 1 h. The resin was washed once in lysis buffer, twice in wash-350 buffer (1 $\times$  PBS with [NaCl] at 350 mM, 0.1% Tween 20, 1 mM DTT, and 100  $\mu$ g/mL PMSF) and twice in wash buffer (1 $\times$  PBS, 0.1% Tween 20, 1 mM DTT, and 100  $\mu$ g/mL PMSF). Each wash consisted of a 5-min incubation at 4 °C on a nutator with 1 mL of the appropriate buffer. Resin was collected by centrifugation for 2 min at 2,000  $\times$  g, and supernatant was removed. Fusion protein concentration and purity were verified by SDS/PAGE, as for Sir3p and Sir2p/Sir4p above.

FLAG-fusion domains were purified from *E. coli* in a manner similar to GST fusion proteins, except postclarification lysate was directly incubated with M2 anti-flag affinity resin (Sigma;

A2220). Once the resin was washed, protein was eluted with 0.2 mg/mL 3 $\times$  FLAG peptide (Sigma; F4799) in 1 $\times$  PBS. Fusion protein concentration and purity were verified by SDS/PAGE, as described above.

**Analysis of Enzyme ATP Hydrolysis Kinetics.** ATP hydrolysis assays were performed as described (3), except that quantification of images was performed by using ImageJ (*Radiolabeled Gel and TLC Plate Quantification*). For experiments to measure enzyme  $K_m$ , 10 nM enzyme was used. As a nucleic acid cofactor, supercoiled pUC19 (NEB; no. N3041S) plasmid DNA was present, at appropriate concentrations of calculated 200-bp DNA equivalent (13.43 per 2,686-bp plasmid). Microsoft Excel 2010 linear regression was used to calculate the initial velocity of each ATP hydrolysis reaction. This velocity was plotted as a function of 200-bp-mer concentration via Graphpad Prism (Version 6). Nonlinear fitting to the Michaelis-Menten equation yielded  $V_{max}$  and  $K_m$  parameters. Experiments were performed in triplicate, and error bars represent sample SD.

**Chromatin Reconstitution and Remodeling Assays.** Recombinant *Xenopus laevis* H2A, H2AS113C, H2B, H3, and H4 histones were expressed from pET vectors in BL-21(DE3) *E. coli*. Histones were purified and reassembled into octamers as described (4). Octamer containing H2AS113C was biotinylated as described (5), and biotinylation was confirmed by Western blot analysis with HRP-Streptavidin. Histone octamers were reconstituted onto purified template DNA by the step salt dialysis method (6) at a nucleosome positioning sequence (NPS) to octamer molar ratio of  $\sim$ 0.94–1.0. For biotinylated chromatin, one-sixth of the octamer added to the reconstitution contained biotinylated H2AS113C—the rest of the octamer was wild type. After reconstitution, a fraction of each array was digested with EcoRI and electrophoresed on a 4% (wt/vol) Native PAGE gel, in 0.5 $\times$  TBE buffer (pH 8.0), to resolve nucleosomal and free DNA and estimate nucleosomal saturation.

Milligram quantities of 208-11 and 208-12 *L. variegatus* 5S NPS array-containing plasmid DNA (CP589 and CP426, respectively) were purified from *E. coli* (QIAGEN; no. 12191). DNA was digested with a combination of HhaI, NotI, and HindIII restriction enzymes, and the array DNA molecule was subsequently separated and purified via a 120-mL Sephacryl S-500 gel filtration column (GE; no. 17-0613-01). The 282-bp–Mid601 DNA was amplified via PCR by using Taq polymerase (NEB; no. M0273L) from plasmid pGEM-3Z lower strand 601 (CP1024) using primers GATCCTCTAGAGTCGGGAGCTC and TGACCAAGGAAAGCATGATTCTTAC. DNA was purified by phenol/chloroform extraction and ethanol precipitation and then digested with XbaI restriction endonuclease. The 208-11 array DNA and 282-bp–Mid601 DNA were radiolabeled by an end fill-in reaction using Klenow Fragment (NEB; no. M0212S) with alpha-<sup>32</sup>P dCTP and then purified by phenol/chloroform extraction and G-25 resin spin columns.

Mononucleosome sliding assays were performed in 25 mM Hepes, pH 7.5, 50 mM NaCl, 5 mM MgCl<sub>2</sub>, 0.05% Tween 20, 1 mM ATP, 1% glycerol, 100  $\mu$ g/mL BSA, and 1 mM DTT. Given amounts of chromatin-remodeling enzyme were incubated with 12 nM 282-bp–Mid601 mononucleosome at 30 °C for 10 min. To stop the reaction, 10  $\mu$ L of the reaction was added to 2.4  $\mu$ L of stop buffer [50 mM EDTA, 20% (vol/vol) glycerol, 1 mg/mL supercoiled plasmid DNA], mixed, and quenched on ice. These quenched aliquots were subjected to native PAGE for 45 min at

120 V, in a 4% (wt/vol) gel, in 0.5× TBE. Before visualization, these gels were dried under vacuum for 45 min at 80 °C on a Bio-Rad gel dryer (model 583).

Restriction enzyme accessibility assays were performed as described (7), except that 0.5 U/mL SalI-HF (NEB; no. R3138T) was used in place of HincII enzyme and that 5 nM chromatin-remodeling enzyme and 1.25 nM radiolabeled 208-11 array were used. After phenol/chloroform extraction, cut and uncut DNA were separated by electrophoresis in a 1% agarose gel. Before visualization, these gels were dried under vacuum for 90 min at 60 °C.

**Radiolabeled Gel and TLC Plate Quantification.** Dried TLC plates, acrylamide gels, and agarose gels were exposed to Molecular Dynamics storage phosphor screens (generally, 3 h for ATPase assays and overnight for mononucleosome sliding or restriction enzyme accessibility assay gels). The screens were scanned on a Storm 820 scanner and then quantitated in ImageJ after processing with the Linearize GelData plugin ([rsb.info.nih.gov/ij/plugins/linearize-gel-data.html](http://rsb.info.nih.gov/ij/plugins/linearize-gel-data.html)). For ATPase assays, intensity of free phosphate signal was measured and normalized to the sum of free phosphate plus unhydrolyzed ATP signal. For mononucleosome sliding assays, the intensity of the band corresponding to a centrally positioned nucleosome was measured and normalized to whole-lane intensity. For restriction enzyme accessibility assays, intensity of uncut array DNA signal was normalized to the sum of cut and uncut DNA signal. Experiments were performed in triplicate, and error bars represent sample SD.

**Sir3 Eviction Assay.** A concentration of 8 nM biotinylated nucleosomal array (96 nM nucleosomes) was incubated with 96 nM Sir3p (unless experimentally varied) in binding buffer (25 mM Hepes, pH 7.5, 50 mM NaCl, 1.75 mM MgCl<sub>2</sub>, 0.05% Tween 20, 1 mM DTT) for 25 min at 22 °C. Then, an equal volume of 2× enzyme mix (double concentration of chromatin-remodeling enzyme listed in Fig. 4E; 2 mM Mg·ATP, 25 mM Hepes, pH 7.5, 100 mM NaCl, 1.75 mM MgCl<sub>2</sub>, 0.05% Tween 20, 1 mM DTT) was added, and the reaction proceeded for 10 min at 22 °C.

This reaction was then incubated with 10 μg/μL Streptavidin-coated magnetic beads (Invitrogen; catalog no. 11205D) for 5 min at 22 °C. The magnetic beads had been washed twice in pull-down buffer and blocked for 15 min at 22 °C in pull-down buffer supplemented with 100 μg/mL BSA. During blocking and array binding, beads were kept continually suspended by constant rotation. After binding the array to beads, the beads were magnetically captured and the supernatant “unbound” fraction was removed. The beads were resuspended in 1× SDS/PAGE sample buffer, heated for 5 min at 95 °C, and care was taken to magnetically extract the stripped beads from the supernatant “bound” fraction. These fractions were subjected to SDS/PAGE and electroblotted onto nitrocellulose membrane. Sir3 was immunodetected by HRP-FLAG (Sigma-Aldrich; catalog no. A8592) immunoblotting, and H3 was detected by immunoblotting with Abcam antibody no. 1,791. For quantification, the blot in ECL was photographed on a Fujifilm LAS 3000 CCD apparatus and quantified with ImageJ by using the ISAC plugin ([rsb.info.nih.gov/ij/plugins/isac.html](http://rsb.info.nih.gov/ij/plugins/isac.html)). Experiments were performed in triplicate, and error bars represent sample SD.

**Protein Capture Assays.** A total of 2–10 μg of resin-bound protein (equal masses were used of all proteins within the same experiment) of Sir3p-FLAG (on anti-FLAG resin, from right after the wash steps in the purification protocol), SWI/SNF (on calmodulin affinity resin), or recombinant GST fusion protein (on glutathione Sepharose resin) was incubated with 20 μL of free partner protein (20 nM SWI/SNF, RSC, or ISW2; 100 nM Sir3; ~100 μM domain flag fusion) in wash buffer (1× PBS with 0.1% Tween 20, 1 mM DTT, 100 μg/mL PMSF) for 30 min at 22 °C with continuous gentle rotation. Resin was washed twice with 200 μL

of wash buffer and then resuspended in 12 μL of 1× SDS/PAGE sample buffer, heated to 95 °C for 5 min, centrifuged at 18,000 × *g* in a tabletop microcentrifuge; the resultant supernatant was subjected to SDS/PAGE. These gels were electroblotted onto a nitrocellulose membrane, and equal resin-bound protein loading was confirmed by Ponceau staining. Protein was detected by Western analysis with the denoted antibodies. αArp9p Santa Cruz yN-19 goat polyclonal IgG was used to detect Arp9p in Westerns, and tap-tagged proteins were detected by probing for CBP (Millipore; no. 07-482).

**Far Western Assays.** ~300 nmol each of each purified complex was subjected to SDS/PAGE and electroblotting via wet transfer onto PVDF membrane. Insufficient protein was loaded to visualize by Ponceau staining, so an identical gel was visualized by silver stain (Life Technologies; LC6070) to confirm that equal amounts of complex were used. Far Western analysis was performed as described (8), with 3 mL of 10 nM purified Sir3p-FLAG solution in 1× PBS and 3mg/mL BSA as the probe solution. Sir3p-bound peptide bands were subsequently detected with HRP-conjugated anti-FLAG antibody (Sigma; no. A8592) and visualized with ECL (Thermo; no. 34087).

**Structural Modeling.** A predicted structure for the SWI/SNF ATPase domain was created by the Phyre2 protein fold prediction server ([www.sbg.bio.ic.ac.uk/phyre2/html/page.cgi?id=index](http://www.sbg.bio.ic.ac.uk/phyre2/html/page.cgi?id=index)) (9). Protein Data Bank (PDB) files were visualized for figures by using PyMOL (Version 1.3; [www.pymol.org/](http://www.pymol.org/)). For structural alignment, crystal structures of *Saccharomyces cerevisiae* (PDB ID code 1M4Z) and *M. musculus* (PDB ID code 4DOV) Orc1 (10, 11) were aligned by using the Research Collaboratory for Structural Bioinformatics PDB Protein Comparison Tool ([www.rcsb.org/pdb/workbench/workbench.do?action=menu](http://www.rcsb.org/pdb/workbench/workbench.do?action=menu)) and visualized in Jmol ([jmol.sourceforge.net/](http://jmol.sourceforge.net/)). Orc1 BAH domain sequences were aligned by using EMBOSS Needle ([www.ebi.ac.uk/Tools/psa/emboss\\_needle/](http://www.ebi.ac.uk/Tools/psa/emboss_needle/)), and Snf2p homolog N-terminal ATPase lobes were aligned by using Clustal Omega ([www.ebi.ac.uk/Tools/msa/clustalo/](http://www.ebi.ac.uk/Tools/msa/clustalo/)).

**Plasmids.** Plasmid for expressing GST-fusion human Orc1 BAH domain was a kind gift of Or Gozani (Stanford University, Stanford, CA) (11). Molecular cloning via PCR, restriction digestion, plasmid ligation, and transformation into *E. coli* was performed by standard methods. Phusion polymerase was used for PCR amplification during cloning (NEB; no. M0530S). For GST fusion protein cloning, coding sequences were cloned into the BamHI and EcoRI restriction sites on pGEX-3X; recombinant flag-domains were cloned into pET expression vectors. Site-directed mutagenesis was used to generate the HSAΔ10 mutation (Agilent; no. 200523). Oligonucleotides used in cloning are listed in Table S1. For cloning details, Table S2.

**Yeast Strains and Genetic Methods.** For yeast strains used, see Table S3. Standard genetic methods were used for yeast sporulation and tetrad dissection. One copy of the *SWI2* gene was deleted in a diploid strain by a standard PCR-based method (12).

Yeast transformations were performed by using the lithium acetate/PEG/ssDNA carrier method (13). Oligonucleotides and plasmids used for deletion cassette amplification and deletion confirmation are listed in Tables S1 and S2. Yeast genomic DNA preparations were performed by using the glass bead/phenol method (14). Yeast protein extracts were prepared by the standard TCA/glass beads method. Ab5154 and ab1791 antibodies (Abcam) were used for Western blots to detect Swi2p-auxin-inducible degron (AID) and H3 (input), respectively, according to manufacturer recommendations.

For galactose-induced HO endonuclease expression and mating-type switching assays, cells were incubated in appropriate

lactate/glycerol medium to maintain selective pressure (synthetic URA dropout medium for CY2041 + pGal-HO experiments in Fig. S4A and YP otherwise; both contained 3% (vol/vol) glycerol, 2% (vol/vol) lactate, 0.05% dextrose, G418, and medium at pH 6.6). At midlog phase ( $OD_{600} \sim 0.4$ ), galactose was added to a final concentration of 2% (vol/vol) to induce HO expression, leading to DSB formation at the *MAT* locus. After 1 h (4 h for *swi2Δ* in the plate-based mating-type switching assay in Fig. S4C), glucose was added to a final concentration of 2% (vol/vol) to begin glucose repression of HO transcription. For plate-based mating-type switching, cells were diluted at this point to yield 100–200 colonies per plate (dilution empirically determined) and plated onto YPD. After 5 d of growth at 22 °C, colonies were replica plated onto YPD plates with mating-type tester lawns. After growth overnight at 22 °C, mating plates were replica-plated onto synthetic total dropout plates to score colonies with successful mating events.

For yeast genomic DNA preparations to assay DSB formation and repair kinetics via quantitative PCR (qPCR), samples were taken by collecting  $\sim 10^7$  cells at the appropriate time intervals and centrifuging them at  $2500 \times g$  for 5 min, 4 °C, in a Beckman J6-B (JS-4.2 rotor). Cell pellets were washed once with ice-cold  $dH_2O$  before storing at  $-80$  °C, until processing as above. For inducible degradation of Swi2p–AID, CY1766 yeast culture was grown at 25 °C in YP–lactate until it reached an  $OD_{600}$  of 0.25. At that point, the culture was split in half, and either NAA (dissolved at a concentration of 100 mM in 100% ethanol) was added to a final concentration of 1 mM, or an equal amount of just 100% ethanol was used. After 2 h, galactose was added to induce *MAT* locus DSBs, and the experimental timecourse was started (see above). Once added, cells were kept in 1-NAA throughout the experiment.

For serial dilution spot plate assays, CY57 background yeast cells were cultured to saturation at 30 °C in 5 mL of YPD + G418 (two overnights for *SWI2* and *swi2-Δ10R* cells, three overnights for *swi2Δ* cells). Yeast was diluted to an  $OD_{600}$  of 1.0 in sterile  $dH_2O$ , and serially 4.64-fold diluted six times more. A total of 7  $\mu$ L of each of these seven dilutions was spotted onto plates of the indicated medium. Where used, raffinose was at 2% wt/vol, galactose was 2% wt/vol, HU was at 50 mM, and antimycin A was at 2  $\mu$ g/mL.

For the silencing establishment assay, single colonies of CY1755 (*swi2Δ TELVR::URA3*) that were freshly transformed with either CP1410 or CP1413 were picked off of transformation plates and streaked out onto SD-URA+G418 plates. Biological replicates were performed from separate CP1410/CP1413 transformant colonies. After 2 d at 30 °C, colonies were picked off the  $-URA$  plate and inoculated into SC+G418. Cells were kept at an  $OD_{600}$  between 0.05 and 0.60 at 30 °C for 3 d by repeated dilution into fresh, prewarmed SC+G418. Time points were taken during those 3 d by diluting cells to an  $OD_{600}$  where 200  $\mu$ L of the cell dilution yielded  $\sim 150$ –400 colonies when plated on 5-FOA+G418. These dilutions were determined empirically, both for strain and for time since beginning growth in SC+G418 (before five population doublings; undiluted culture was used). Another portion of the cell culture was contemporarily diluted 1:3,000 and plated on SC+G418 to count total cells. After 3 d, colonies were counted. The number of colonies for each strain and for each time point was normalized both to di-

lution (above) and to the number of cells that grew on SC+G418. The experiment was biologically repeated five times, and error bars are sample SD.

For RNR induction, yeast cells were grown to midlog, a 0-h time point was taken, then HU was added to a final concentration of 200 mM. After 2 h, the 2-h time point was taken.

**qPCR.** Primers were designed with Primer3Plus ([primer3plus.com/cgi-bin/dev/primer3plus.cgi](http://primer3plus.com/cgi-bin/dev/primer3plus.cgi)) with qPCR server settings enabled, except primers for monitoring *MAT* locus breakage and repair, which were obtained from prior literature (14). Reactions were carried out at 25 U/mL NEB Taq (NEB; no. M0273), in NEB Standard TAQ buffer (10 mM Tris, 50 mM KCl, 1.5 mM  $MgCl_2$ , pH 8.3 at room temperature) supplemented with an additional 1.5 mM  $MgCl_2$ , 200  $\mu$ M of each dNTP, 200 nM of each primer, SYBR Green (Invitrogen S-7563; diluted 1:2,000 from stock into DMSO, then diluted 33.33-fold into reaction), and 50-fold diluted Rox dye (BIO-RAD; no. 172–5858). Thermocycling was performed in an Applied Biosystems 7300 RT-PCR system, using Rox as the passive reference dye. Plates were held at 50 °C for 2 min and then held at 95 °C for 10 min, then cycled 40 times between 95 °C for 15 s and 61 °C for 1 min, and finally subjected to dissociation curve analysis. CT values were obtained via the “auto analyze” feature of the AB 7300 software. Standard curves for each primer pair were used to derive slope and intercept values that were subsequently used to calculate quantities of nucleic acid from CTs. Locus quantities were normalized to the ACT1 quantity for their respective nucleic acid prep. All qPCRs were performed in technical duplicate and averaged to give a value for each biological replicate. Three biological replicates were performed for all experiments, except for supplemental Fig. S4, which was performed in biological duplicate and averaged. All error bars represent SD of the sample calculated from the three biological replicate values.

**RNA Isolation.** RNA was extracted and purified by the hot phenol method, as described (15), from 10- to 50-mL CY57 background cultures (at  $OD \sim 0.4$ –0.6) grown in YEPD, followed by contaminant DNA removal using RNase-free DNaseI (Ambion; no. 1907). RNA concentration and purity were measured on a Nanodrop spectrophotometer. For qRT-PCR analysis, 100 ng of total RNA was subjected to reverse transcription (Invitrogen; no. 11746) with locus-specific qPCR primers for 30 min at 50 °C, before qPCR as above.

For RNA-seq analysis, three biological replicates each of CY57-background yeast cultures, containing either CP1410 or CP1413, were grown to midlog and processed as above. Each replicate was derived from a different transformant colony. The 25- $\mu$ g samples of RNA were processed for 90-bp paired-end sequencing by BGI International (HK). Data were filtered to remove adaptors, contamination, and low-quality reads from the raw reads. Each sample yielded 28.8–36.4 million reads. These reads were all mapped to the Ensembl EF4 *Saccharomyces cerevisiae* genome build via Tophat (Version 2.0.9) and Bowtie (Version 2.1.0.0), using Samtools (Version 0.1.18.0). Relative gene expression was quantified by Cufflinks (Version 2.1.1), and the resultant data were visualized by CummeRbund (Version 2.6.1) in R (Version 2.15.1) (all as in ref. 16).

- Smith CL, Horowitz-Scherer R, Flanagan JF, Woodcock CL, Peterson CL (2003) Structural analysis of the yeast SWI/SNF chromatin remodeling complex. *Nat Struct Biol* 10(2):141–145.
- Buchberger JR, et al. (2008) Sir3-nucleosome interactions in spreading of silent chromatin in *Saccharomyces cerevisiae*. *Mol Cell Biol* 28(22):6903–6918.
- Yang X, Zaurin R, Beato M, Peterson CL (2007) Swi3p controls SWI/SNF assembly and ATP-dependent H2A-H2B displacement. *Nat Struct Mol Biol* 14(6):540–547.
- Luger K, Rechsteiner TJ, Flaus AJ, Wayne MM, Richmond TJ (1997) Characterization of nucleosome core particles containing histone proteins made in bacteria. *J Mol Biol* 272(3):301–311.

- Swygert SG, et al. (2014) Solution-state conformation and stoichiometry of yeast Sir3 heterochromatin fibres. *Nat Commun* 5:4751.
- Hansen JC, van Holde KE, Lohr D (1991) The mechanism of nucleosome assembly onto oligomers of the sea urchin 5 S DNA positioning sequence. *J Biol Chem* 266(7):4276–4282.
- Logie C, Peterson CL (1997) Catalytic activity of the yeast SWI/SNF complex on reconstituted nucleosome arrays. *EMBO J* 16(22):6772–6782.
- Edmondson DG, Dent SYR (2001) *Current Protocols in Protein Science* (John Wiley & Sons, New York).

9. Kelley LA, Sternberg MJE (2009) Protein structure prediction on the Web: A case study using the Phyre server. *Nat Protoc* 4(3):363–371.
10. Connelly JJ, et al. (2006) Structure and function of the *Saccharomyces cerevisiae* Sir3 BAH domain. *Mol Cell Biol* 26(8):3256–3265.
11. Kuo AJ, et al. (2012) The BAH domain of ORC1 links H4K20me2 to DNA replication licensing and Meier-Gorlin syndrome. *Nature* 484(7392):115–119.
12. Goldstein AL, McCusker JH (1999) Three new dominant drug resistance cassettes for gene disruption in *Saccharomyces cerevisiae*. *Yeast* 15(14):1541–1553.
13. Schiestl RH, Gietz RD (1989) High efficiency transformation of intact yeast cells using single stranded nucleic acids as a carrier. *Curr Genet* 16(5-6):339–346.
14. Sugawara N, Haber JE (2012) *DNA Repair Protocols, Methods in Molecular Biology*, ed Bjergbæk L (Humana, New York), pp 349–370.
15. Collart MA, Oliviero S (2001) *Current Protocols in Molecular Biology* (John Wiley & Sons, New York).
16. Trapnell C, et al. (2012) Differential gene and transcript expression analysis of RNA-seq experiments with TopHat and Cufflinks. *Nat Protoc* 7(3):562–578.

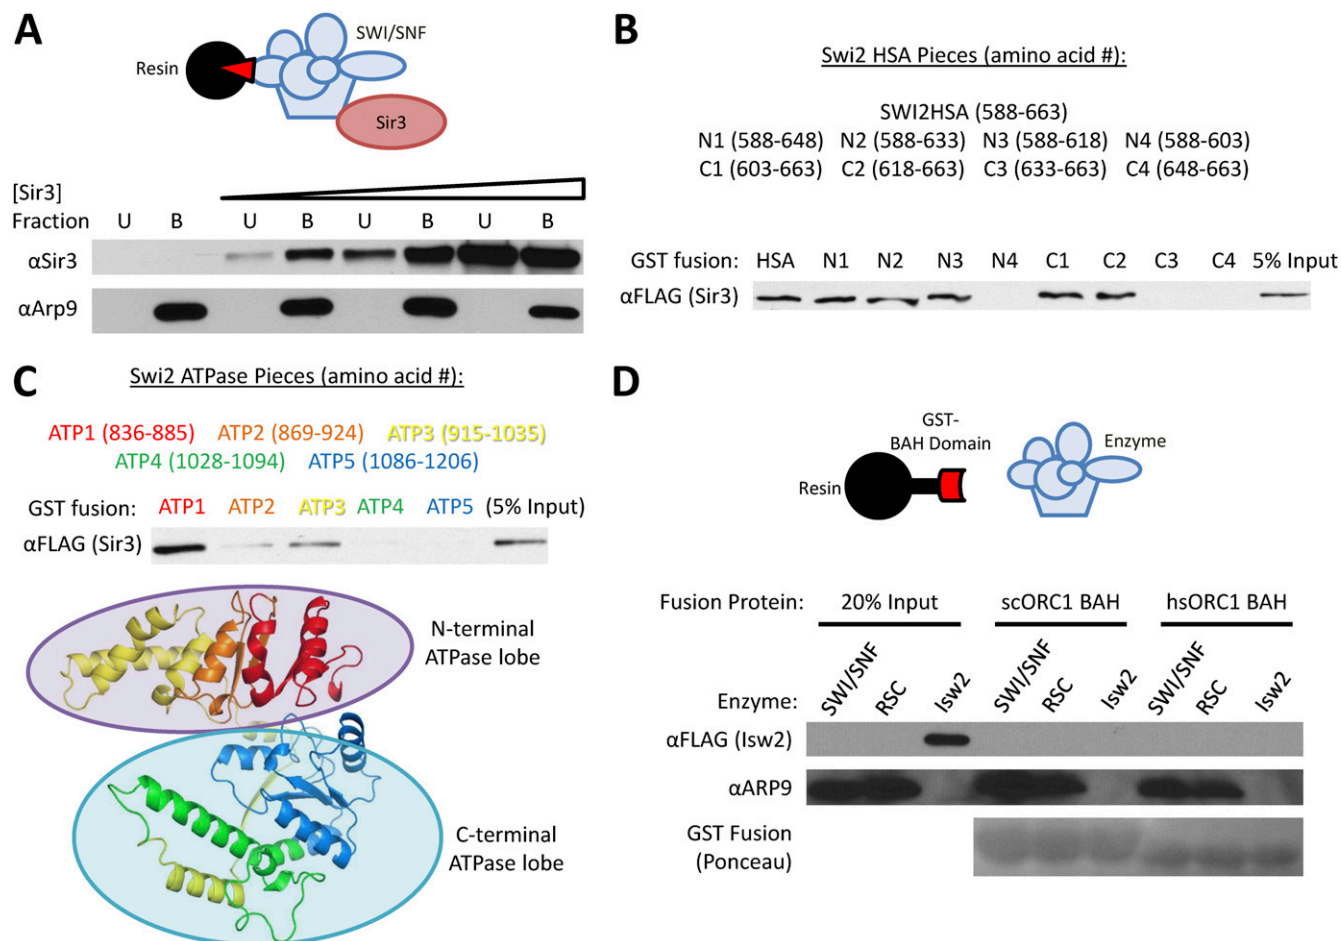

**Fig. S1.** Characterizing Swi2p subdomains that bind Sir3p. (A) Sir3p binds to immobilized SWI/SNF. Calmodulin affinity resin-bound SWI/SNF was incubated with increasing concentrations of Sir3p. (B) A central 10-amino-acid stretch of the Swi2p HSA domain is required for Sir3p binding. GST fusions of the Swi2p HSA and progressive N-terminal truncations (C1–C4) and C-terminal truncations (N1–N4) of it were assayed for ability to bind Sir3p. (C) The N-terminal lobe of the Swi2 ATPase is able to bind Sir3p. (Upper) Pieces of the Swi2p ATPase were assayed as GST fusions for ability to interact with free Sir3p. (Lower) Phyre2 predicted structure ([www.sbg.bio.ic.ac.uk/phyre2/html/page.cgi?id=index](http://www.sbg.bio.ic.ac.uk/phyre2/html/page.cgi?id=index)) of the Swi2p ATPase domain, with different colors representing the corresponding regions of the ATPase domain. (D) SWI/SNF and RSC complexes interact with *H. sapiens* Orc1 BAH domain.

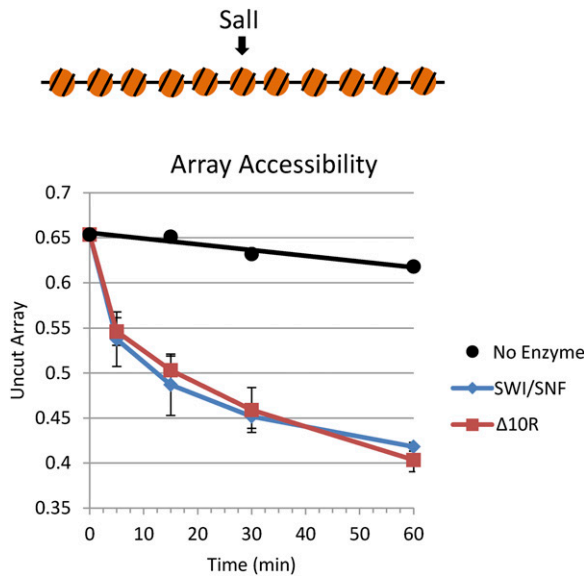

**Fig. S2.** SWI/SNF–Sir3p contact disruption does not influence array remodeling. SWI/SNF and SWI/SNF–Δ10R were assayed for nucleosome array remodeling activity via the restriction enzyme accessibility assay. Experiment was done in triplicate; error bars denote sample SD.

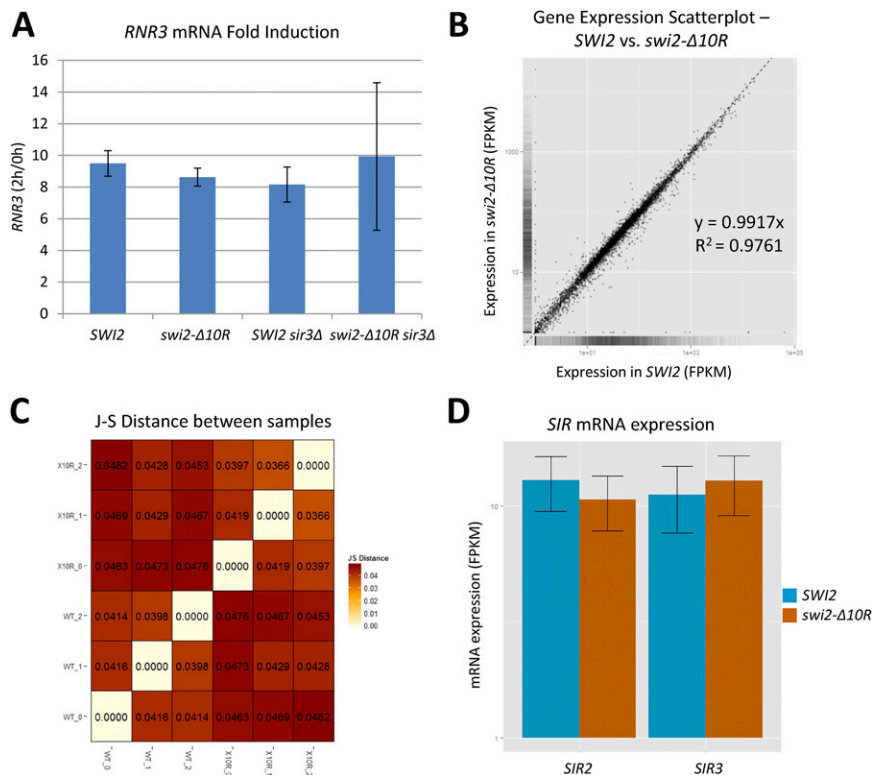

**Fig. S3.** *swi2-Δ10R* has no major transcriptional effects. (A) A *swi2Δ* strain, harboring either *SWI2* (CP1410) or *swi2-Δ10R*(CP1413), and with or without *SIR3* (labels as in Fig. 5A), was exposed to 200 mM HU. Expression of *RNR3* relative to *ACT1* expression in each strain was quantified by RT-qPCR before and after exposure to HU. Experiment was done in biological triplicate; error bars represent sample SD. (B) Scatterplot of gene expression in *SWI2* and *swi2-Δ10R* as measured by RNA-seq. Each gene is represented by a point. (C) Jensen–Shannon distance between *SWI2* and *swi2-Δ10R* RNA-seq replicates. (D) *SIR2* and *SIR3* transcript levels are not affected in the *swi2-Δ10R* mutant strain.



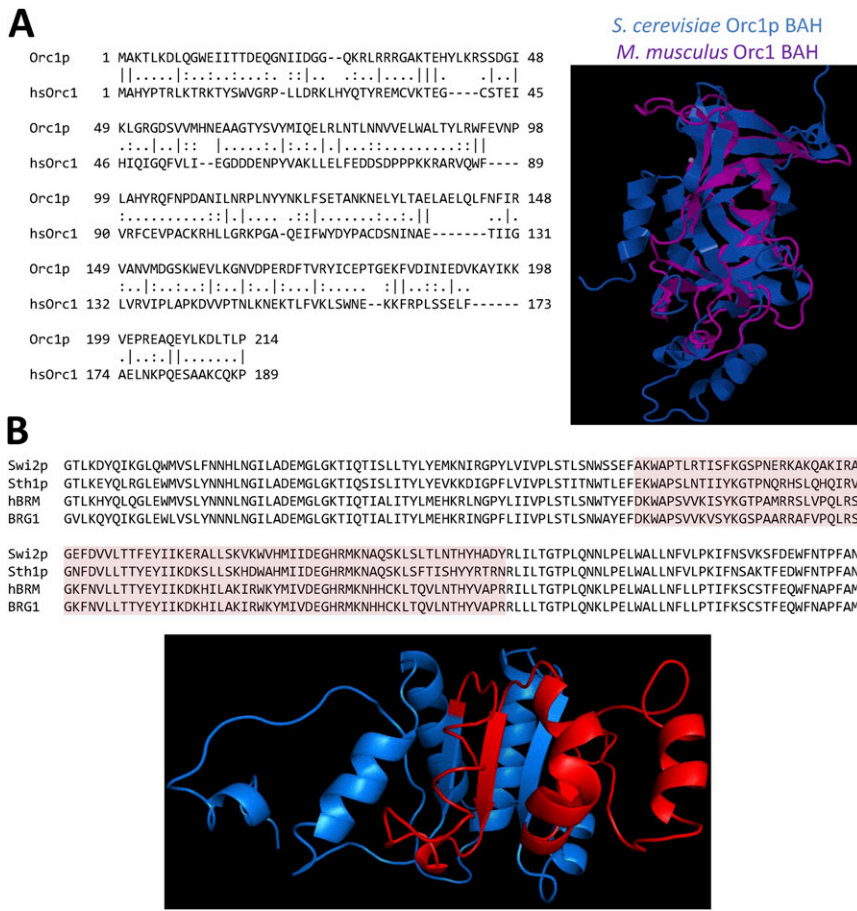

**Fig. S5.** Conservation of Orc1 BAH domains and SWI/SNF ATPase domains. (A, Left) Primary sequence alignment of *S. cerevisiae* Orc1p and *H. sapiens* Orc1 BAH domains. (Right) Structural alignment of *Mus musculus* (PDB ID code 4DOV) and *S. cerevisiae* (PDB ID code 1M4Z) Orc1 BAH domains. (B, Upper) Sequence alignment of the N-terminal ATPase lobes of Snf2p, Sth1p, hBRM and BRG1. (Lower) The Snf2p variable region highlighted in red is also colored red in the structural prediction of the Snf2p N-terminal ATPase lobe.





Table S1. Cont.

| Name                                     | Description | Sequence                                                                                   |
|------------------------------------------|-------------|--------------------------------------------------------------------------------------------|
| SWI2ATP2UP                               |             | CAGATAGGATCCCCGTTCTGACTACCTTTGAG                                                           |
| SWI2ATP3UP                               |             | CAGATAGGATCCCCCATGCAGATTATAGATTA                                                           |
| SWI2ATP4UP                               |             | CAGATAGGATCCCCCGTCGTCCTTTTATCGGT                                                           |
| SWI2ATP5UP                               |             | CAGATAGGATCCCCGCTGGTAAATTTGAACTA                                                           |
| SWI2ATP1DOWN                             |             | CGGTAGGAATCCCCCTTGGATAAAAAGTGCTCT                                                          |
| SWI2ATP2DOWN                             |             | CGGTAGGAATCCCACCTGTCAAAATTAATCT                                                            |
| SWI2ATP3DOWN                             |             | CGGTAGGAATCCCACCGATAAAAAGACGACG                                                            |
| SWI2ATP4DOWN                             |             | CGGTAGGAATCCCTCTATCTAATAGTTCAAA                                                            |
| SIR3BAH $\Delta$ 187DOWN                 |             | CGGTAGGAATCCCAATTGGTACAAACTTTTCCG                                                          |
| SIR3BAH $\Delta$ 153DOWN                 |             | CGGTAGGAATCCCTATCTGTCCAACCTGCAATG                                                          |
| SIR3BAH $\Delta$ 128DOWN                 |             | CGGTAGGAATCCCTACTTCGTTGAAAATTTATC                                                          |
| SIR3BAH $\Delta$ 98DOWN                  |             | CGGTAGGAATCCCTTTGAGTTCAAACCATCTCA                                                          |
| STH1ATP1UP                               |             | CAGATAGGATCCCTGGACTTTAGAATTTGAA                                                            |
| STH1ATP1DOWN                             |             | CGGTAGGAATCCCTTTTGATAAAAAGAGATT                                                            |
| ORC1BAH UP                               |             | CAGATAGGATCCCCATGGCAAAAACGTTGAAGG                                                          |
| ORC1BAH DOWN                             |             | CGGTAGGAATCCCTTTTGAGGACCTCTTTTG                                                            |
| RSC2BAH UP                               |             | CAGATAAGATCTCCGATGAAGTCATTGTAATAATATC                                                      |
| RSC2BAH DOWN                             |             | CGGTAGCAATTGCCGGGGAAGGATATTTGAAG                                                           |
| RSC2CT1 DOWN                             |             | CGGTAGCAATTGCCAAGAGCATTTGCTGTTG                                                            |
| Amplification of FLAG-tagged domains     |             |                                                                                            |
| SWI2HSAFLAGUP                            |             | CAGATACATATGCATGAATTACTTAAGTTAG                                                            |
| SWI2HSAFLAGDOWN                          |             | CGGTAGGGATCCTTACTTATCGTCATCGTCTTTATAATCCTTGTGCATCGTCATCTT-<br>TGTAGTCATCGTTCGCCTTTAAAGCCTG |
| BAH-FLAGUP                               |             | CAGATACATATGGCTAAAACATTGAAAG                                                               |
| BAH-FLAGDOWN                             |             | CGGTAGGGATCCTTACTTATCGTCATCGTCTTTATAATCCTTGTGCATCGTCATCTT-<br>TGTAGTCCCACCTCACTGGTACAGA    |
| <i>STH1</i> ATPase lobe 1 amplification  |             |                                                                                            |
| STHATP123UP                              |             | GATTCGGGTACCTTAAAAGAGTATCAATTACGA                                                          |
| STHATP123DOWN                            |             | CACAGGCACCGGTGTTGGCAAATGGAGTATTAACC                                                        |
| Site-directed mutagenesis of <i>SWI2</i> |             |                                                                                            |
| SWI2HSA-10 S                             |             | CGATGAATAAATCCGCCAAGAATAAAAGGTTG                                                           |
| SWI2HSA-10 AS                            |             | CAACCTTTTATCTTGGCGGATTTATTCATCG                                                            |
| C-terminal TAP tag for CP1414            |             |                                                                                            |
| TAP-Xho UP                               |             | CAGATACTCGAGCATGGAAAAGAGAAGATGGAAAAAG                                                      |
| TAP-Xho DOWN                             |             | CGGTAGCTCGAGGTTGACTTCCCCGCGGAATC                                                           |

Table S2. Plasmids

| ID no. | Backbone | Description                                                                                                      |
|--------|----------|------------------------------------------------------------------------------------------------------------------|
| CP126  | pGEX-3X  | Plasmid for IPTG-inducing expression of N-terminally GST-tagged fusion proteins in DE3 <i>E. coli</i>            |
| CP137  | YCp50    | pGAL-HO; Gal-inducible HO endonuclease expression from YCp50 (GAL10 promoter->HO; CEN/ARS, URA3)                 |
| CP337  | pRS315   | SWI2 in pRS315 (~6300bp Sau3AI-partial piece with ~1kb 5'UTR, ORF, and ~300 bp 3' UTR)                           |
| CP426  | pBS SK-  | 208-12 array; cut out with HhaI to digest backbone                                                               |
| CP589  | pBS SK-  | 208-11 array; cut out with NotI, HindII, and use HhaI to digest backbone                                         |
| CP717  | pET      | xH2A expression                                                                                                  |
| CP718  | pET      | xH2B expression                                                                                                  |
| CP719  | pET      | xH3 expression                                                                                                   |
| CP720  | pET      | xH4 expression                                                                                                   |
| CP967  | pFA6a    | pAG25; for cerevisiae gene deletion cassette template; NatMX4 cassette                                           |
| CP969  | pFA6a    | pAG32; for cerevisiae gene deletion cassette template; HphMX4 cassette                                           |
| CP999  | pFA6a    | Plasmid for C-terminally tap-tagging                                                                             |
| CP1024 | pGEM-3z  | 601 NPS mono plasmid                                                                                             |
| CP1109 | pET      | xH2AS113C expression                                                                                             |
| CP1163 | pDM641   | pGal1-HA-Sir2/Leu plasmid derived from pRS315                                                                    |
| CP1164 | pDM654   | pGal1-TAP-Sir4/Ura plasmid derived from pRS315                                                                   |
| CP1165 | pDM1009  | pGal1/10-Sir3-FLAG/Leu plasmid derived from pRS425                                                               |
| CP1210 | pMK43    | C-terminal AID-tag with KanMX                                                                                    |
| CP1211 | pMK76    | Stul-Linearizable URA3-integrable AtTIR1                                                                         |
| CP1250 | pRS410   | Yeast CEN/ARS Plasmid; KanMX; Addgene no. 11258                                                                  |
| CP1253 | pMK43    | C-terminal AID-tag with HphMX                                                                                    |
| CP1406 | pRS410   | pRS410 cut KpnI-Sall, SWI2 C terminus inserted (CP337 KpnI-Sall)                                                 |
| CP1407 | pRS410   | CP1406 cut KpnI-AgeI, STH1 ATPase lobe I inserted (aa 468-665; KpnI-SgrAI; 52 divergent aa converted)            |
| CP1408 | pRS410   | pRS410 cut NgoMIV-KpnI, SWI2 N terminus inserted (CP337 NgoMIV-KpnI)                                             |
| CP1409 | pRS410   | CP1408, site-directed mutagenesis HSA $\Delta$ 10 (aa 613-623 deleted)                                           |
| CP1410 | pRS410   | SWI2 in pRS410 CP1408 cut KpnI-Sall, SWI2 C terminus inserted (CP337 KpnI-Sall)                                  |
| CP1413 | pRS410   | SWI2 ' $\Delta$ 10R' in pRS410 CP1409 cut KpnI-Sall, STH1-SWI2 chimera ATPase C-term inserted (CP1407 KpnI-Sall) |
| CP1414 | pRS410   | CP1407 cut XhoI-BamHI with 4xpA-CTAP inserted (PCR from CP999 with in-frame XhoI inserted; XhoI-BglIII)          |
| CP1415 | pRS410   | SWI2 ' $\Delta$ 10R'-TAP in pRS410 CP1414 cut NaeI-AgeI with SWI2 HSA10 N terminus inserted (CP1413 NaeI-AgeI)   |
| CP1416 | pGEX-3X  | GST-SWI2 N (aa 1-390)                                                                                            |
| CP1417 | pGEX-3X  | GST-SWI2 HSA (aa 361-780)                                                                                        |
| CP1418 | pGEX-3X  | GST-SWI2 HSAN (aa 316-663)                                                                                       |
| CP1419 | pGEX-3X  | GST-SWI2 HSAC (aa 588-780)                                                                                       |
| CP1420 | pGEX-3X  | GST-SWI2 ATP (aa 836-1206)                                                                                       |
| CP1421 | pGEX-3X  | GST-SWI2 C (aa 1216-1440)                                                                                        |
| CP1422 | pGEX-3X  | GST-SWI2 BROMO (aa 1321-1703)                                                                                    |
| CP1423 | pGEX-3X  | GST-SWI2 HSA (aa 588-663)                                                                                        |
| CP1424 | pGEX-3X  | GST-SWI2 HSAN1 (aa 588-648)                                                                                      |
| CP1425 | pGEX-3X  | GST-SWI2 HSAN2 (aa 588-633)                                                                                      |
| CP1426 | pGEX-3X  | GST-SWI2 HSAN3 (aa 588-618)                                                                                      |
| CP1427 | pGEX-3X  | GST-SWI2 HSAN4 (aa 588-603)                                                                                      |
| CP1428 | pGEX-3X  | GST-SWI2 HSAC1 (aa 603-663)                                                                                      |
| CP1429 | pGEX-3X  | GST-SWI2 HSAC2 (aa 618-663)                                                                                      |
| CP1430 | pGEX-3X  | GST-SWI2 HSAC3 (aa 633-663)                                                                                      |
| CP1431 | pGEX-3X  | GST-SWI2 HSAC4 (aa 648-663)                                                                                      |
| CP1432 | pGEX-3X  | GST-SWI2 HSA $\Delta$ 10 (CP1423 with 613-623 deleted)                                                           |
| CP1433 | pGEX-3X  | GST-SWI2 ATP1 (aa 836-885)                                                                                       |
| CP1434 | pGEX-3X  | GST-SWI2 ATP2 (aa 869-924)                                                                                       |
| CP1435 | pGEX-3X  | GST-SWI2 ATP3 (aa 915-1035)                                                                                      |
| CP1436 | pGEX-3X  | GST-SWI2 ATP4 (aa 1028-1094)                                                                                     |
| CP1437 | pGEX-3X  | GST-SWI2 ATP5 (aa 1086-1206)                                                                                     |
| CP1438 | pGEX-3X  | GST-STH1 ATP1 (aa 539-588)                                                                                       |
| CP1439 | pGEX-3X  | GST-SIR3 BAH (aa 1-214)                                                                                          |
| CP1440 | pGEX-3X  | GST-SIR3 U1 (aa 214-350)                                                                                         |
| CP1441 | pGEX-3X  | GST-SIR3 U2 (aa 300-440)                                                                                         |
| CP1442 | pGEX-3X  | GST-SIR3 MID (aa 460-730)                                                                                        |
| CP1443 | pGEX-3X  | GST-SIR3 AAA (aa 530-845)                                                                                        |
| CP1444 | pGEX-3X  | GST-SIR3 END (aa 790-970)                                                                                        |
| CP1445 | pGEX-3X  | GST-SIR3 BAH1 (aa 1-186)                                                                                         |
| CP1446 | pGEX-3X  | GST-SIR3 BAH2 (aa 1-152)                                                                                         |
| CP1447 | pGEX-3X  | GST-SIR3 BAH3 (aa 1-127)                                                                                         |
| CP1448 | pGEX-3X  | GST-SIR3 BAH4 (aa 1-97)                                                                                          |
| CP1449 | pGEX-3X  | GST-ORC1 BAH (aa 1-214)                                                                                          |

**Table S2. Cont.**

| ID no. | Backbone | Description                   |
|--------|----------|-------------------------------|
| CP1450 | pGEX-3X  | GST-RSC2 BAH (aa 401–557)     |
| CP1451 | pGEX-3X  | GST-RSC2 BAHCT-1 (aa 401–642) |
| CP1452 | pET3a    | SIR3 BAH-FLAG (aa 1–214)      |
| CP1453 | pET3a    | SWI2 HSA-FLAG (aa 588–663)    |

aa, amino acids.

**Table S3. Yeast strains**

| Strain | Source  | MAT                      | Genotype                                                                                                  |
|--------|---------|--------------------------|-----------------------------------------------------------------------------------------------------------|
| CY57   |         | <i>MAT<sub>α</sub></i>   | <i>swi2Δ::His<sup>+</sup> lys2-801<sup>A</sup> ade2-101<sup>°</sup> trp1-Δ1 his3-Δ200 leu2-Δ1 ura3-52</i> |
| CY118  |         | <i>MAT<sub>A</sub></i>   | <i>swi2Δ::His<sup>+</sup> from CY57 background BUT Trp<sup>+</sup></i>                                    |
| CY384  |         | <i>MAT<sub>A</sub></i>   | <i>α tester</i>                                                                                           |
| CY385  |         | <i>MAT<sub>α</sub></i>   | <i>A tester</i>                                                                                           |
| CY915  | JKM179  | <i>MAT<sub>α</sub></i>   | <i>Δho Δhml::ADE1 Δhmr::ADE1 ade1-100 leu2,3-112 lys5 trp1::hisG ura3-52 ade3::GAL::HO</i>                |
| CY924  | JKM154  | <i>MAT<sub>A</sub></i>   | <i>Δho ade1-100 leu2,3-112 lys5 trp1::hisG ura3-52 ade3::GAL::HO</i>                                      |
| CY971  | W303    | <i>MAT<sub>a</sub></i>   | <i>swi2Δ::HIS3 leu2-3,112 trp1-1 can1-100 ura3-1 ade2-1 his3-11,15</i>                                    |
| CY1274 | WDHY668 | <i>MAT<sub>A/α</sub></i> | <i>ura3-52 trp1 leu2-Δ1 his3-Δ200 pep4Δ::HIS3 prb1-Δ1.6R can1</i>                                         |
| CY1496 |         | <i>MAT<sub>A/α</sub></i> | <i>CY1274 with [CP1165]</i>                                                                               |
| CY1497 |         | <i>MAT<sub>A/α</sub></i> | <i>CY1274 with [CP1163 and CP1164]</i>                                                                    |
| CY1503 | BY4741  | <i>MAT<sub>A</sub></i>   | <i>RSC2-TAP</i>                                                                                           |
| CY1504 | BY4741  | <i>MAT<sub>A</sub></i>   | <i>ISW2-FLAG</i>                                                                                          |
| CY1552 | BY4741  | <i>MAT<sub>A</sub></i>   | <i>SWI2-TAP</i>                                                                                           |
| CY1752 | W303    | <i>MAT<sub>A/α</sub></i> | <i>swi2Δ::HIS3/SWI2 sir3Δ::HphMX/SIR3</i>                                                                 |
| CY1754 | L1088   | <i>MAT<sub>A</sub></i>   | <i>ura3Δ0 leu2Δ0 TEL-VR::URA3</i>                                                                         |
| CY1755 | L1089   | <i>MAT<sub>A</sub></i>   | <i>ura3-52 leu2Δ0 snf2Δ::LEU2 TEL-VR::URA3</i>                                                            |
| CY1760 |         | <i>MAT<sub>A/α</sub></i> | <i>CY915 and CY924 mated; swi2Δ::NatMX/SWI2</i>                                                           |
| CY1761 |         | <i>MAT<sub>α</sub></i>   | <i>swi2Δ::NatMX segregant from CY1760 with HML<sub>α</sub> HMR<sub>A</sub></i>                            |
| CY1762 |         | <i>MAT<sub>α</sub></i>   | <i>swi2Δ::NatMX segregant from CY1760 with HML<sub>α</sub> HMR<sub>A</sub></i>                            |
| CY1765 |         | <i>MAT<sub>A</sub></i>   | <i>CY924 with URA3::atTIR1 (CP1211 StuI-linearized)</i>                                                   |
| CY1766 |         | <i>MAT<sub>A</sub></i>   | <i>CY1765 with SWI2-AID::HphMX</i>                                                                        |
| CY2041 |         |                          | <i>swi2Δ::HIS3 segregant from CY1752</i>                                                                  |
| CY2332 |         | <i>MAT<sub>α</sub></i>   | <i>CY57 with sir3Δ::HphMX [CP1410 (SWI2 in pRS410)]</i>                                                   |
| CY2333 |         | <i>MAT<sub>α</sub></i>   | <i>CY57 with sir3Δ::HphMX [CP1413 (Δ10R in pRS410)]</i>                                                   |

**Dataset S1. RNA-seq gene expression analysis of *SWI2* and *swi2-Δ10R***

[Dataset S1](#)
